SEPTEMBER 2020 | VOLUME 177 | NUMBER 9

# The American Journal of Psychiatry

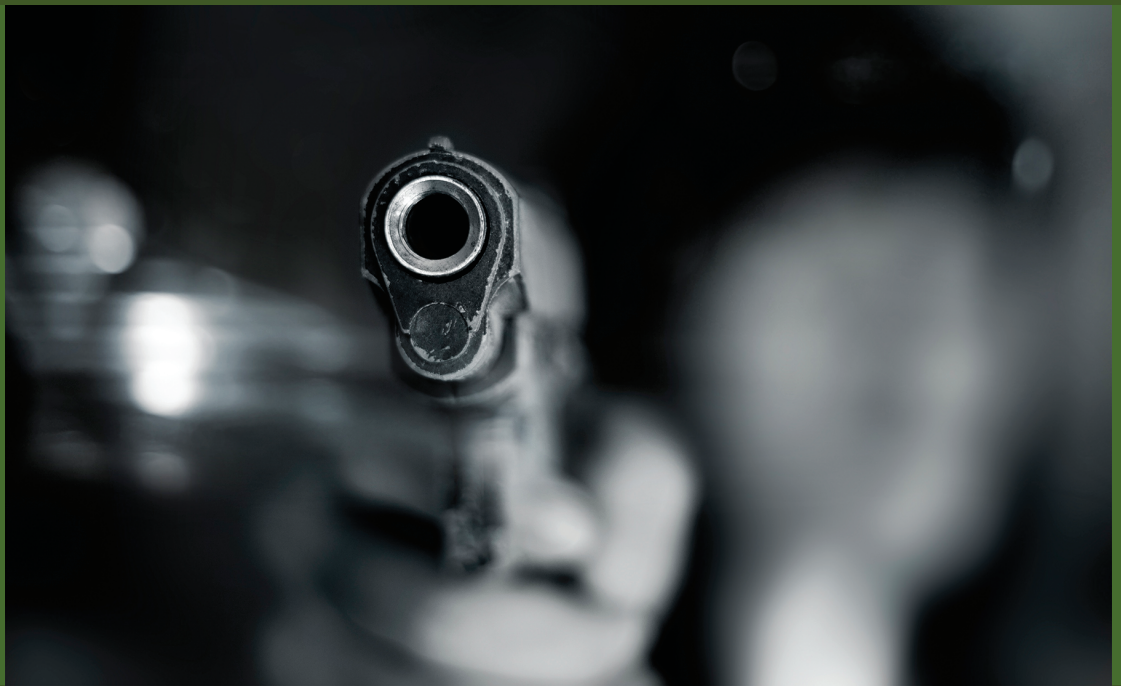

Callous-Unemotional Traits and Risk of Gun Carrying  
and Use During Crime

Early Parenting Intervention Effects on Brain Responses  
to Maternal Cues Among High-Risk Children

Disruptive Behavior Disorders: The Challenge of Delineating  
Mechanisms in the Face of Heterogeneity

From Rare Copy Number Variants to Biological Processes  
in ADHD

AMERICAN  
**PSYCHIATRIC**  
ASSOCIATION 

[ajp.psychiatryonline.org](http://ajp.psychiatryonline.org)
