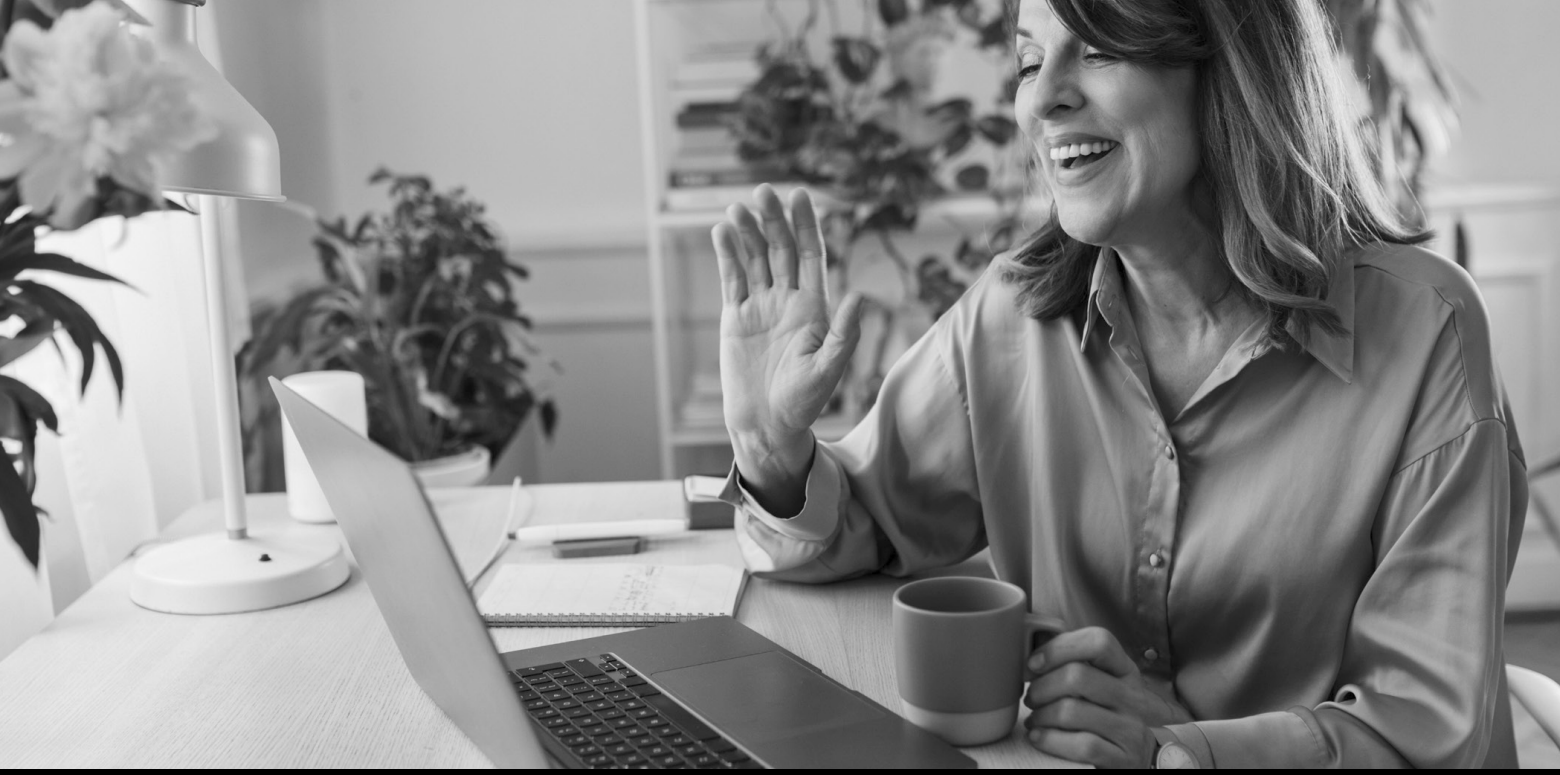

# We've Got You Covered

## American Psychiatric Association Endorsed Professional Liability Insurance Program

Designed for Psychiatrists in all practice settings

**DID YOU KNOW? We find that our policyholders are more likely to receive a board complaint than be named in a claim or lawsuit.**

Most insurance policies provided by employers do not include reimbursement for costs incurred to defend a complaint (or have limits that may be shared with others).

Not to worry... we include up to \$50,000 of defense reimbursement – with the option to increase this limit to \$150,000.

What's more, coverage for **Telepsychiatry** is provided, subject to the terms and conditions of the policy.

*(All discounts, coverage features and rating are subject to individual state approval.)*

Visit us at [apamalpractice.com](http://apamalpractice.com) or call **877-740-1777** to learn more.

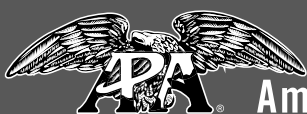

**American Professional Agency**

LEADERS IN PSYCHIATRIC MEDICAL LIABILITY INSURANCE

AMERICAN  
PSYCHIATRIC  
ASSOCIATION

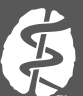

# Evidence

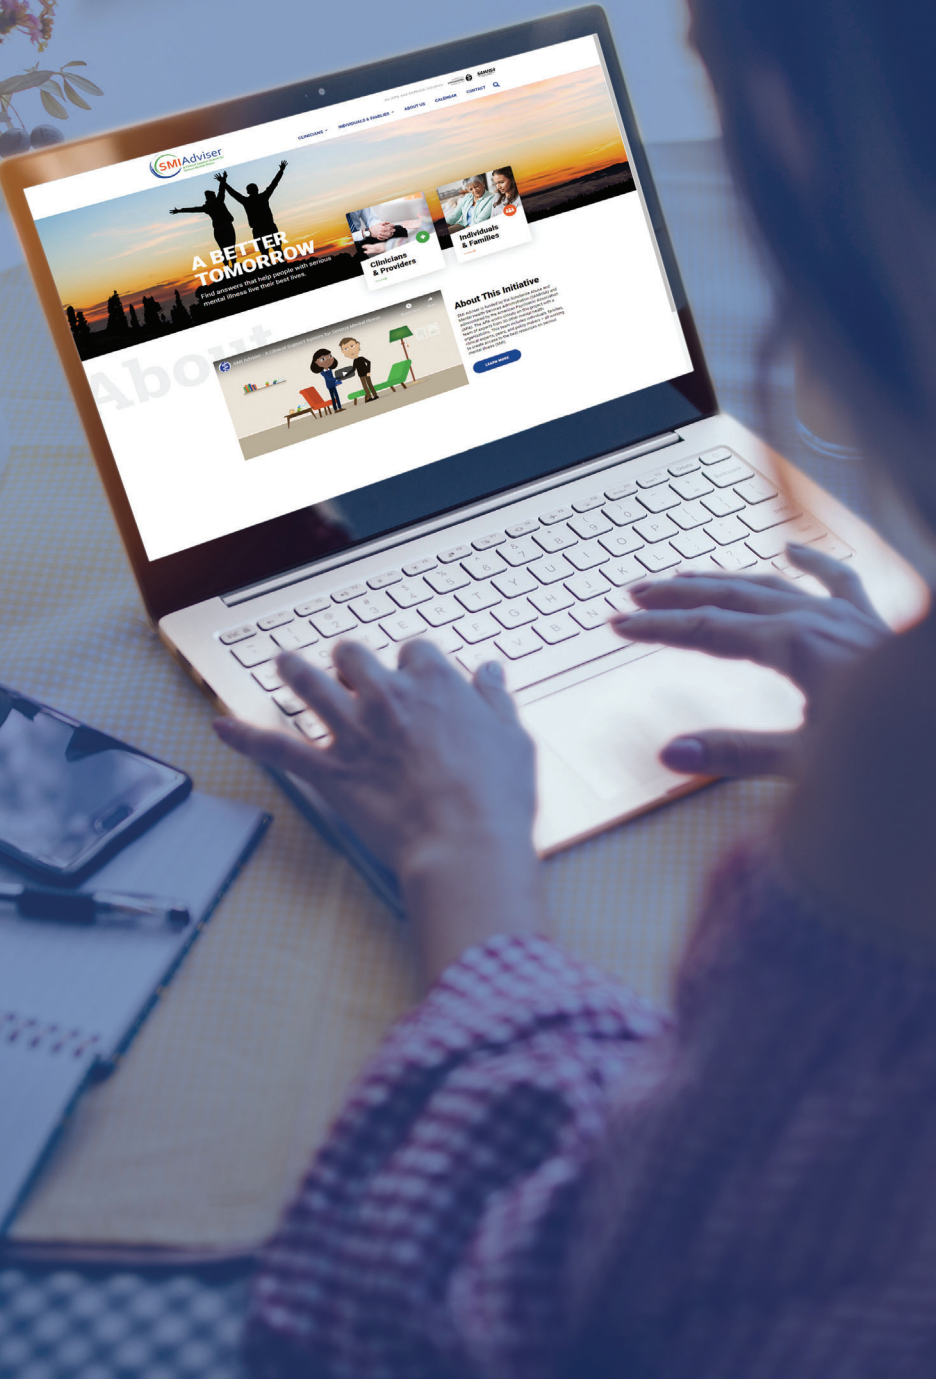

Serious mental illness (SMI) involves complex treatments. That means mental health clinicians often face complex decisions.

Now you can access SMI Adviser's free online catalog to find evidence-based education on SMI. Access 100+ on-demand courses. Attend monthly live webinars. Earn credits if you are a physician, nurse, psychologist, or social worker. And use this guidance to provide person-centered care to individuals who have SMI.

This is just one of many free resources from SMI Adviser.

**Better clinical support. Better resources. Better care for people who have SMI.**

**Join our #MissionForBetter at [SMIadviser.org](https://www.smiadviser.org)**

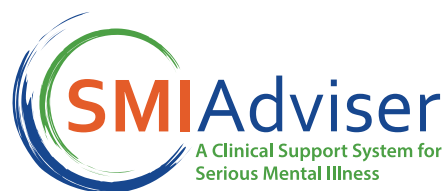

#### GRANT STATEMENT

Funding for this initiative was made possible (in part) by Grant No. 1H79SM080818-01 from SAMHSA. The views expressed in written conference materials or publications and by speakers and moderators do not necessarily reflect the official policies of the Department of Health and Human Services; nor does mention of trade names, commercial practices, or organizations imply endorsement by the U.S. Government.

© 2020 American Psychiatric Association. All rights reserved.

An APA and SAMHSA Initiative

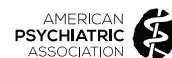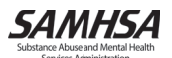

# The American Journal of Psychiatry Residents' Journal

[ajp.psychiatryonline.org/loi/ajp-rj](http://ajp.psychiatryonline.org/loi/ajp-rj)

## Meet the 2020–2021 Editorial Board

### Editor-in-Chief

Matthew Edwards, M.D., *Stanford University*

### Senior Deputy Editor

Austin Blum, M.D., J.D., *University of Chicago*

### Deputy Editors

Rachel Dillinger, M.D., *University of Maryland*

Fiona Fonseca, M.D., *St. Mary Mercy Hospital*

Shirin Vartak, D.O., *Griffin Memorial Hospital*

### Associate Editors

Amanda Calhoun, M.D., M.P.H., *Yale University*

Christopher Magoon, M.D., *Columbia University*

Danielle Lowe, M.D., Ph.D., *Medical University  
of South Carolina*

Jennifer Kim, J.D., M.D., M.S., *St. Barnabas Hospital*

Shixie Jiang, M.D., *University of South Florida*

Matthew Yung, M.D., *University of Texas Southwestern*

Richard Hadi, M.D., *Harbor-UCLA Medical Center*

### Media Editors

Priya Gearin, M.D., *Harvard South Shore*

Barrington Hwang, M.D., *Vanderbilt University*

Bharat Sampathi, M.D., *Kaiser Permanente of  
Northern California*

## Call for Papers

### History of Psychiatry

Deadline: September 15, 2020

Contact Dr. Matthew Edwards for more information.

All article types are welcome;  
all submissions will be peer reviewed.

The *Residents' Journal* is a quarterly e-publication that serves as a forum for sharing ideas and experiences in training, clinical practice, research, and careers.

The *Residents' Journal* considers manuscripts authored by medical students, resident physicians, and fellows. For information about submitting manuscripts, visit the **Author Resources** page online:

[https://ajp.psychiatryonline.org/  
residents\\_journal/rj\\_ifora](https://ajp.psychiatryonline.org/residents_journal/rj_ifora)

The next issue will be available on  
**September 4, 2020.**

[https://ajp.psychiatryonline.org/toc/  
ajp-rj/current](https://ajp.psychiatryonline.org/toc/ajp-rj/current)

In the meantime, continue to follow the *Residents' Journal* on social media for updates on what's to come, and look for our podcasts!

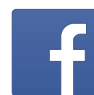

Find us on Facebook

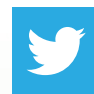

Follow @AJP\_ResJournal

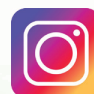

Find us on Instagram

AMERICAN  
PSYCHIATRIC  
ASSOCIATION

PUBLISHING

[www.appi.org](http://www.appi.org)

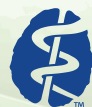

# Go Online

Visit [ajp.psychiatryonline.org](http://ajp.psychiatryonline.org) for these features!

**AJP in Advance** *Discover the latest research advances before they appear in print*

**Parietal-Prefrontal Feedforward Connectivity in Association With Schizophrenia Genetic Risk and Delusions**

An examination of the cognitive components of delusions using a combination of neuroimaging, genetics, and machine learning found that communications across the cortex during updating of new contextual information was dysfunctional in delusions and was associated with genetic risk for schizophrenia. Machine learning models that incorporate brain communication data across healthy subjects and schizophrenia patients could improve predictions of individual patient's symptom severity.

**Diagnostic Classification for Human Autism and Obsessive-Compulsive Disorder Based on Machine Learning From a Primate Genetic Model**

Noninvasive neuroimaging in humans and nonhuman primates identified nine core regions prominently distributed in frontal and temporal cortices that informed autism and OCD diagnostic classification. Models based on functional connections between various regions predicted communication scores of autism patients and compulsivity scores of OCD patients.

**AJP CME** *Earn CME credit: 3 courses per issue*

This month's courses appear on pages 873–876.

**AJP Multimedia** *Access Audio for highlights of each issue*

In AJP Audio this month, Executive Editor Michael Roy speaks with Emily L. Robertson, M.A., and Paul J. Frick, Ph.D., about their research on the role that callous-unemotional traits have in the risk for gun carrying and gun use during a crime (p. 827).

In this month's video, Deputy Editor Daniel S. Pine, M.D., discusses the articles "Subcortical Brain Volume, Regional Cortical Thickness, and Cortical Surface Area Across Disorders: Findings From the ENIGMA ADHD, ASD, and OCD Working Groups" (p. 834) and "Early Parenting Intervention Effects on Brain Responses to Maternal Cues Among High-Risk Children" (p. 818).

**History of Psychiatry** *Revisit the field's rich history through the AJP Archive*

**75 Years Ago This Month: The Incidence of Nail-Biting Among Adults**

Among 6,946 naval recruits aged 17 to 37, 21.5% were nail biters. While the hypothesis put forth to explain this prevalence ("the nail-biting mannerism is regarded as a tension-reducing mechanism acquired, for the most part, unconsciously") might seem unnoteworthy by contemporary standards, at the time it did put forth that the evidence did not support the application of the early Freudian theory of psychosexual development to the findings.

Note  
Our New  
Twitter  
Handle!

@APAPubJournals

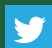

Psychiatry Online

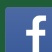

AMERICAN  
PSYCHIATRIC  
ASSOCIATION  
PUBLISHING

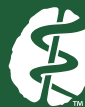

[www.appi.org](http://www.appi.org)  
1-800-368-5777  
[appi@psych.org](mailto:appi@psych.org)
